# Supplementary figures and images for: Cell migration in paediatric glioma; characterisation and potential therapeutic targeting
Source: PubMed Central journal article supplement — Br J Cancer. 2015 Jan 27;112(4):693–703. doi: 10.1038/bjc.2015.16 (PMC4333505; doi:10.1038/bjc.2015.16), 2015-01-27

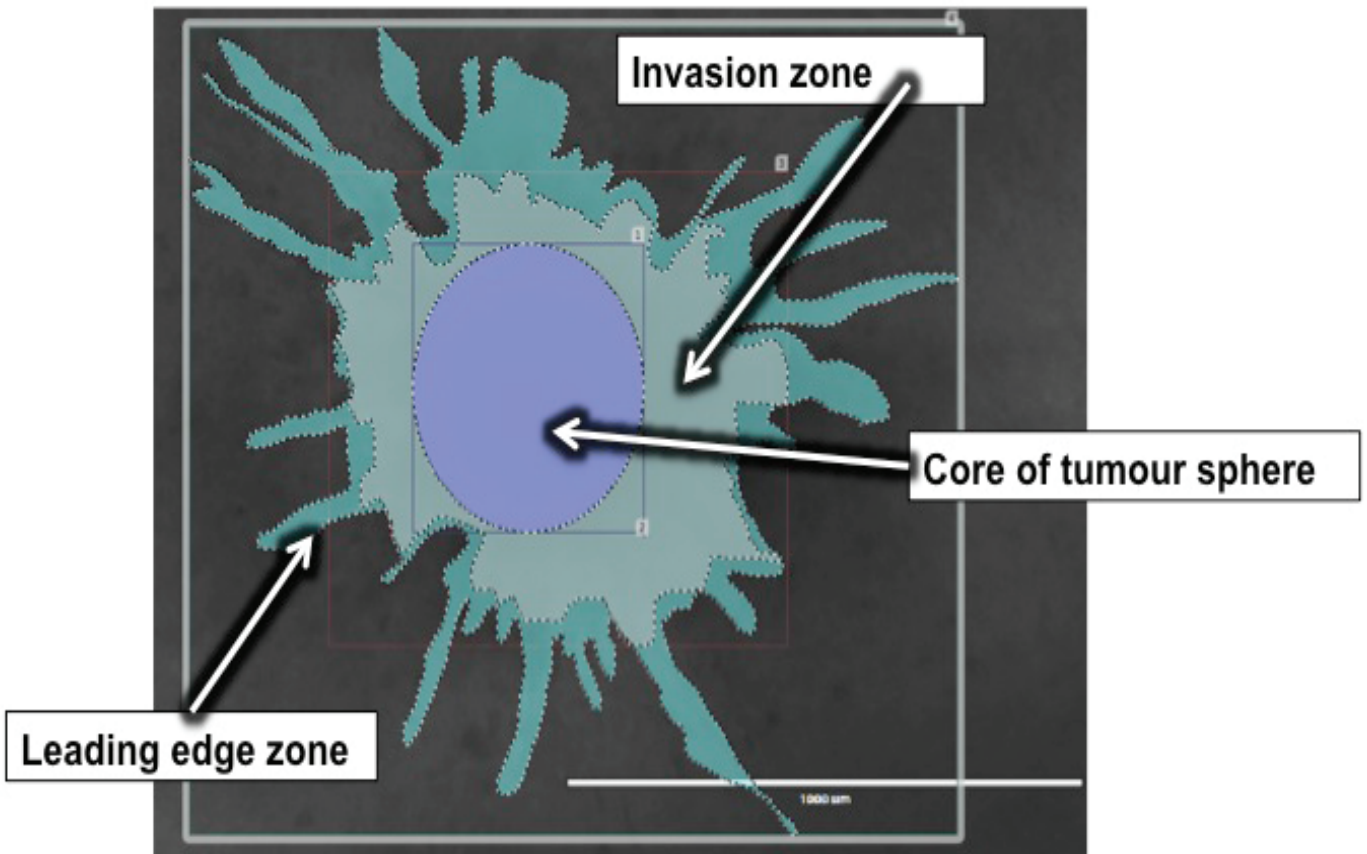

Supplemental figure 1

Supplement: bjc201516x1.pdf [file bjc201516x1.pdf]

SF188

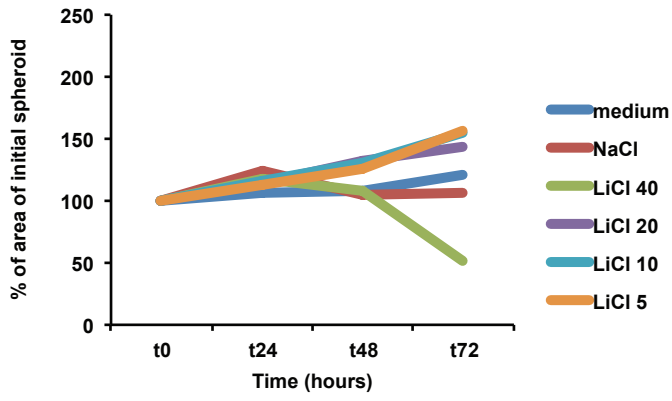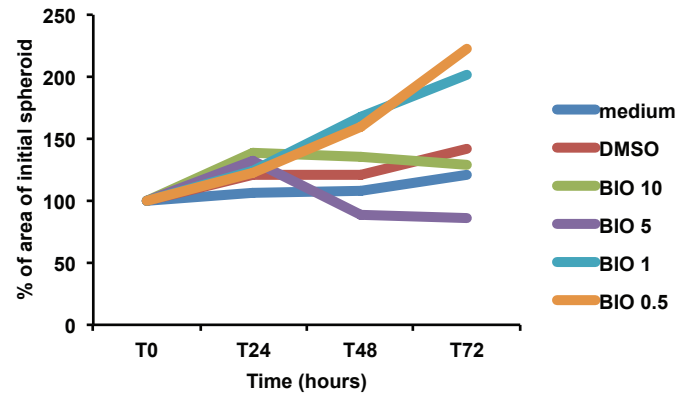

KNS42

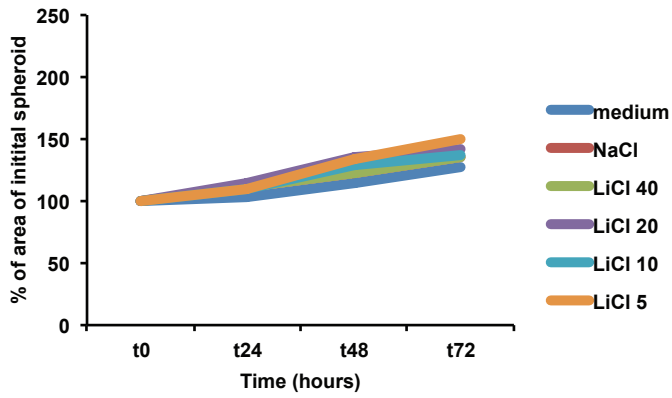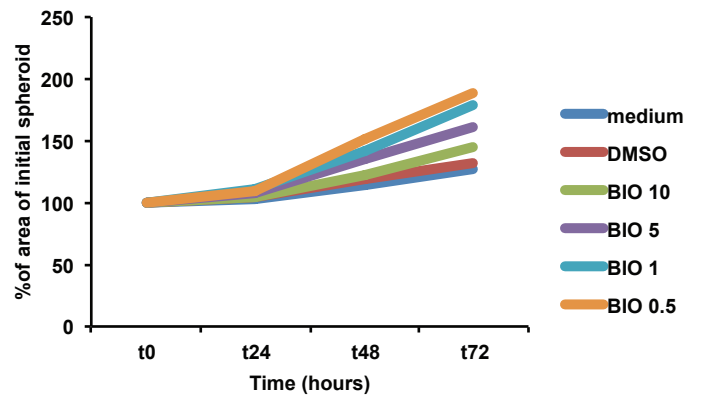

UW479

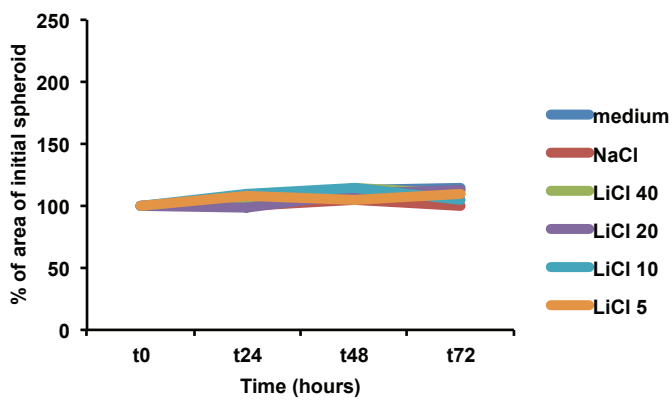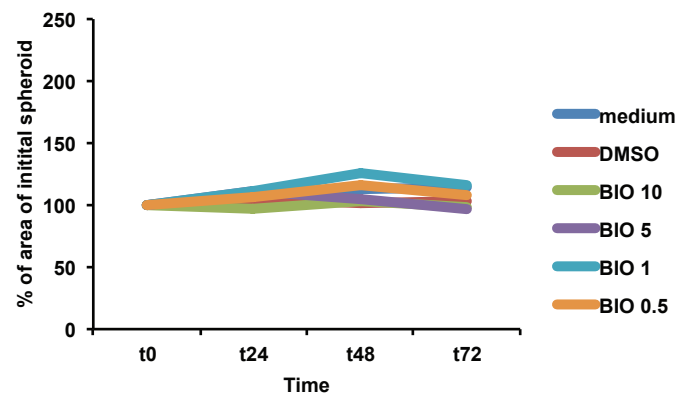

Supplemental figure 2

Supplement: bjc201516x2.pdf [file bjc201516x2.pdf]
